# Supplementary material
Source: Springer Nature journal article supplement (https://www.springermedizin.de/resource/supplementary/13049_2011_293_MOESM2_ESM.pdf/9666280)

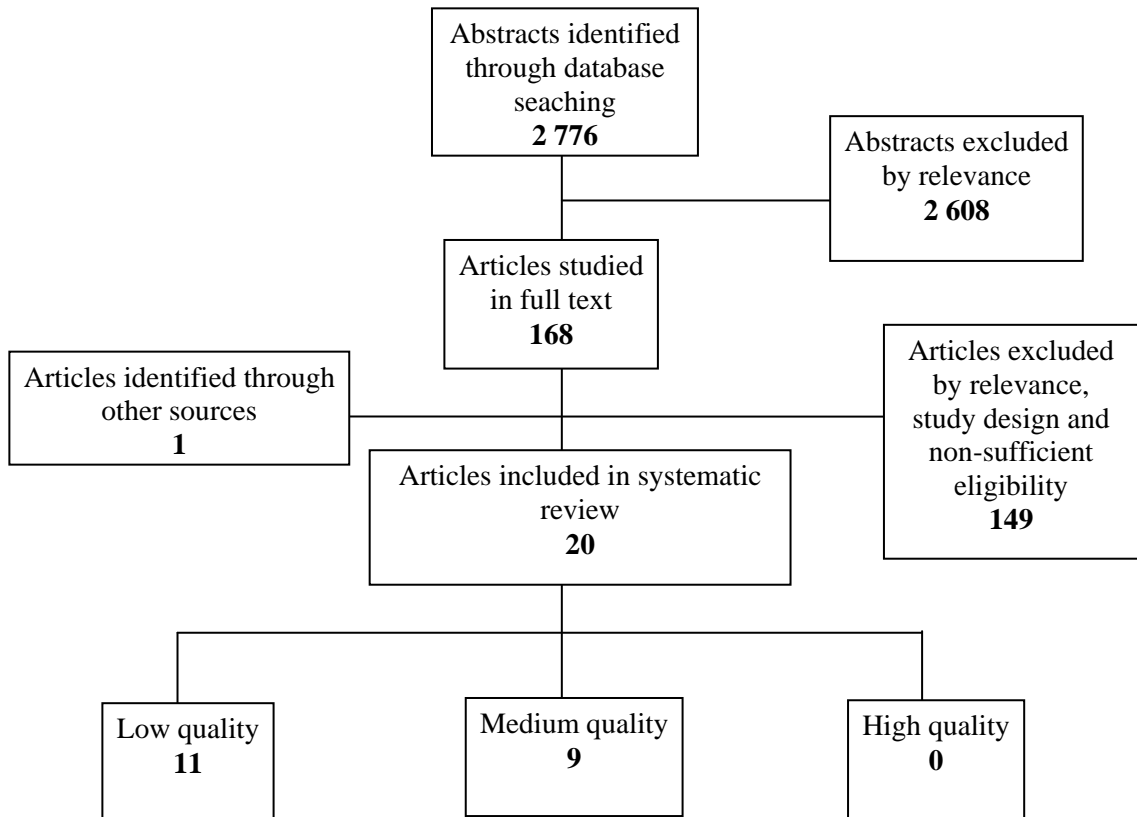

Supplement: MOESM2 [file 9666280]
